# Supplementary material for: Brassica oleracea L. var. italica Aquaporin Reconstituted Proteoliposomes as Nanosystems for Resveratrol Encapsulation
Source: MDPI journal article supplement (doi:10.3390/ijms25041987), 2024-02-06
Supplement: s1 [file s1]

**Figure S1**

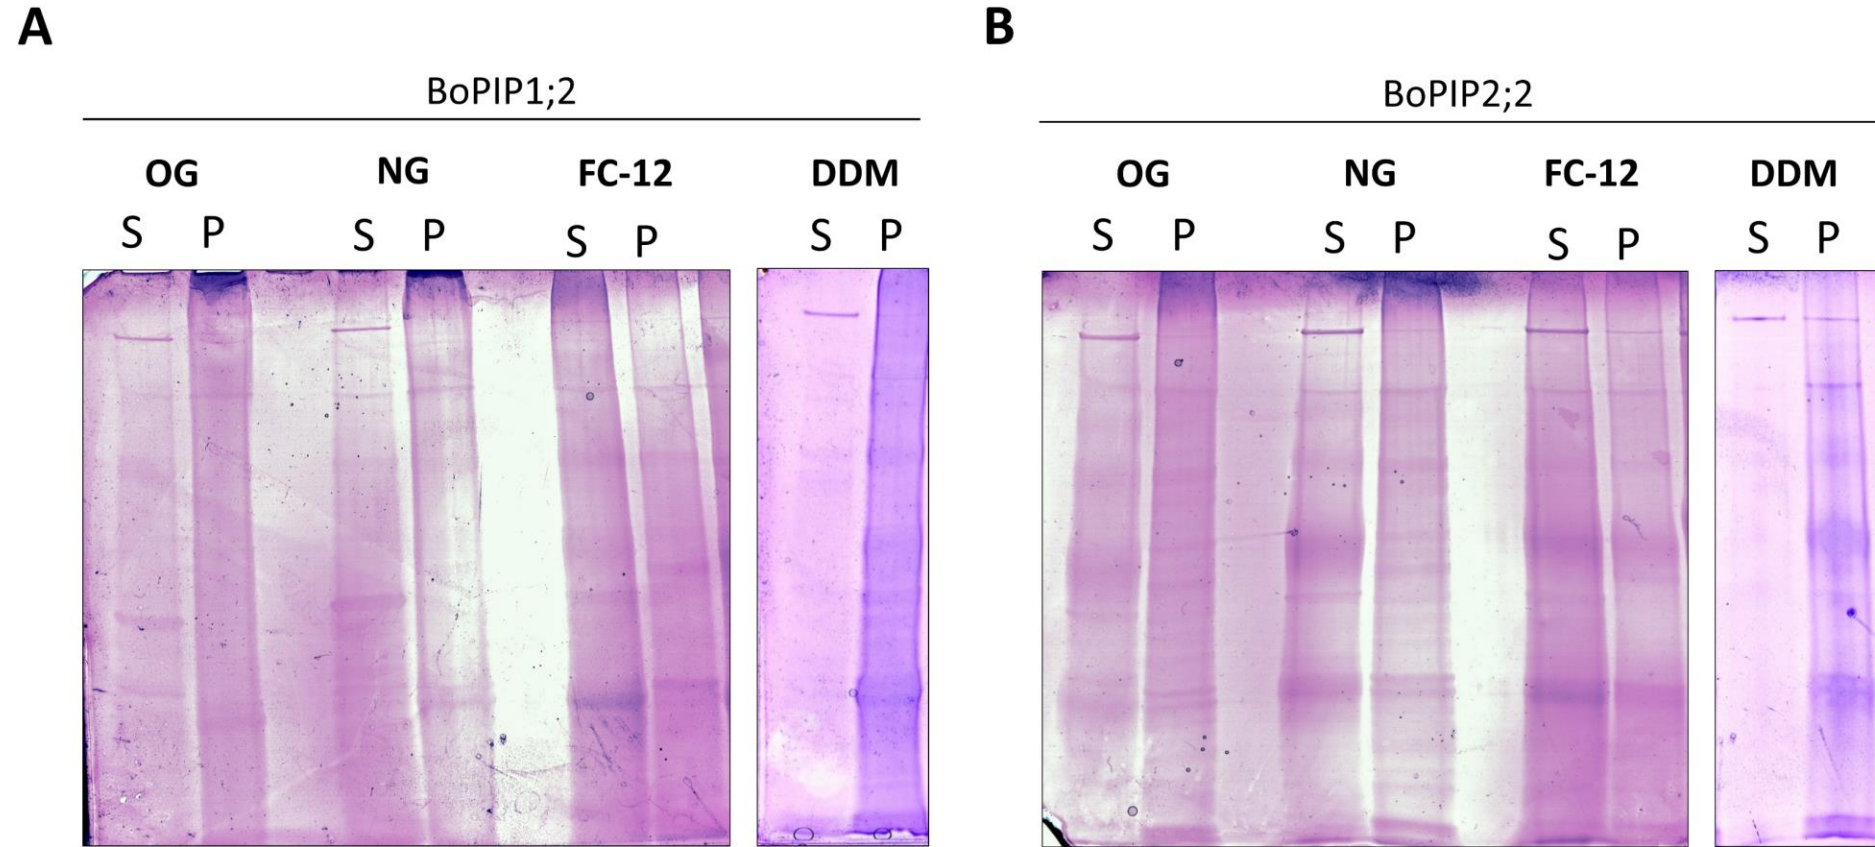

Figure S1.- Detergent screen. Coomassie stained SDS-PAGE gels with the solubilized supernatant (S) fractions and the unsolubilized pellet (P) fractions. Four detergents (n-Octyl- $\beta$ -D-glucoside (OG), n-nonyl- $\beta$ -D-glucoside (NG), n-dodecylphosphocholine (Fos-choline-12), and n-dodecyl- $\beta$ -D-maltopyranoside (DDM)) were screened.

Figure S2

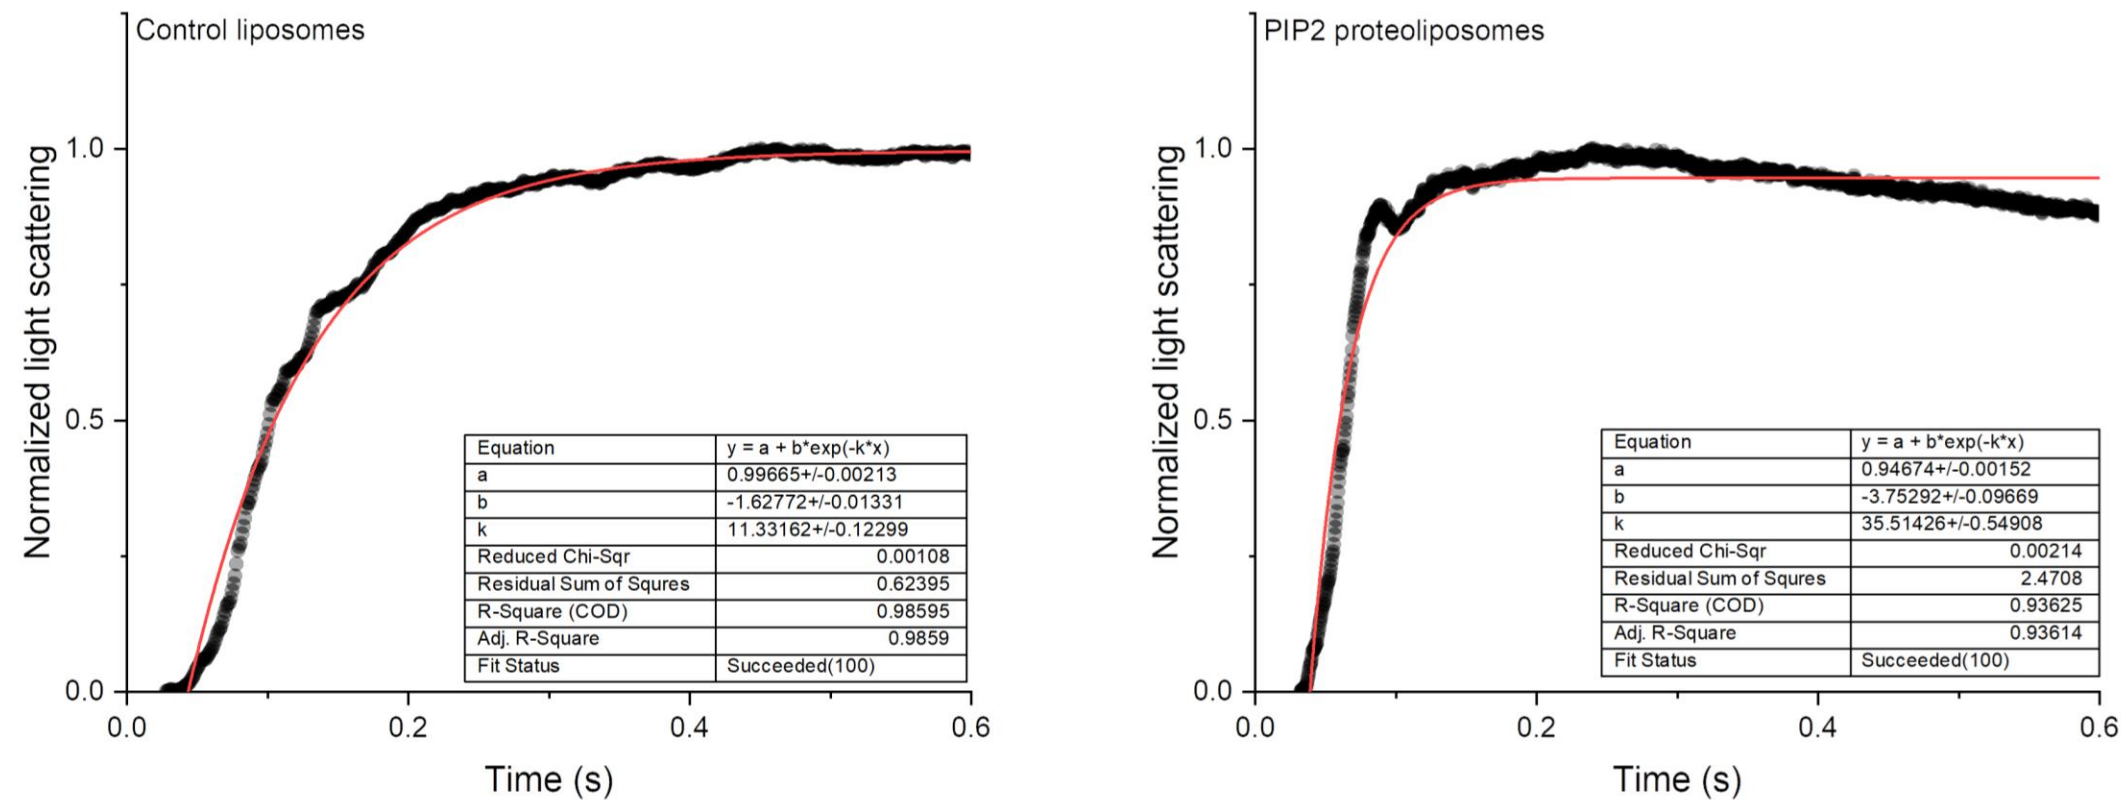

Figure S2.- Time course of increased scattered light intensity in control liposomes and PIP2 proteoliposomes (black) introduced in a stopped-flow apparatus; for both types of membrane preparation, a typical experiment and the fitted monoexponential function are shown.
